# Supplementary material for: The role of the shape resonance state in low energy electron induced single strand break in 2′-deoxycytidine-5′-monophosphate
Source: Royal Society of Chemistry journal article supplement (doi:10.1039/c5cp00126a), 2015-01-01
Supplement: c5cp00126a1.pdf [file c5cp00126a1.pdf]

## SUPPLEMENTARY MATERIALS

I. The optimized structures of neutral and anionic 5'-dCMPH moieties at the (a) HF, and (b) MP2 methods with 6-31+G(d) basis set.

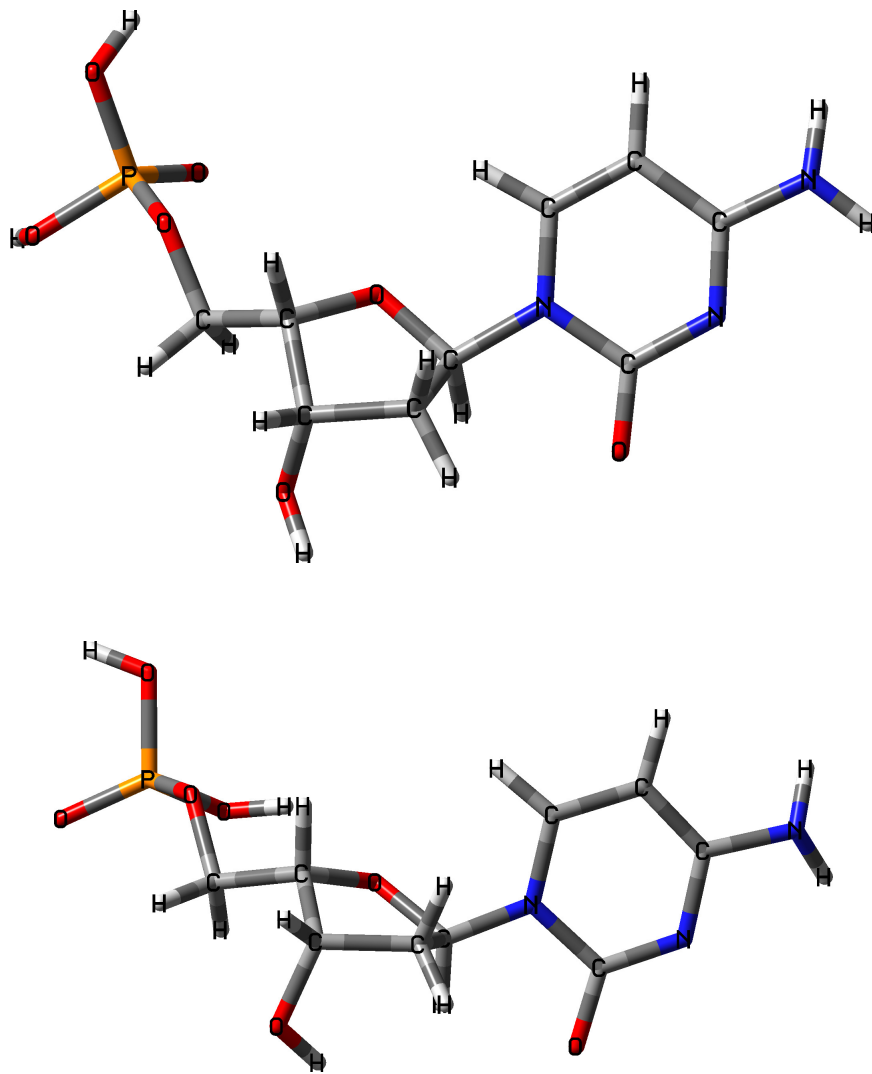

**FIG. S1(A).** The optimized structures of (i) neutral [above] and (ii) anionic [below] 5'-dCMPH moieties at the HF/6-31+G(d) accuracy level.

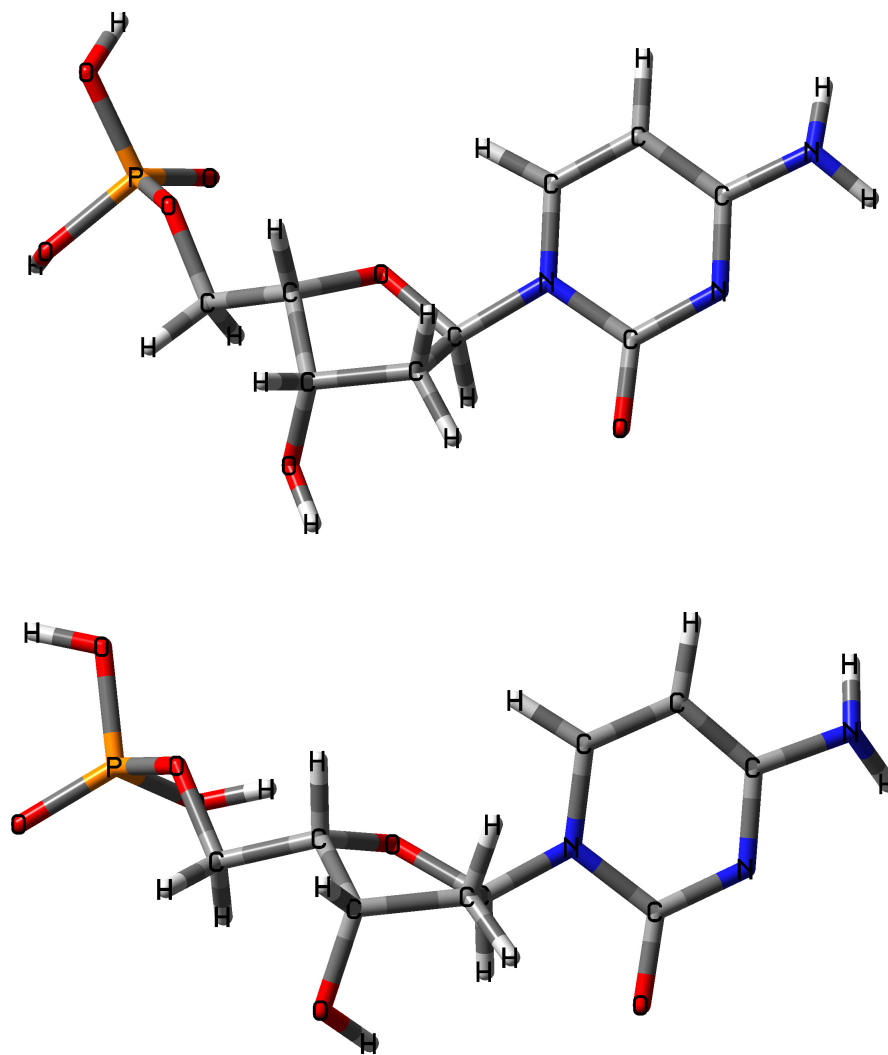

**FIG. S1(B).** The optimized structures of (i) neutral [above] and (ii) anionic [below] 5'-dCMPH moieties at the MP2/6-31+G(d) accuracy level.

II. Wave packet propagation for the ground state wave function  $\phi_0(\mathbf{R})$  of HF potential for target 5'-dCMPH molecule.

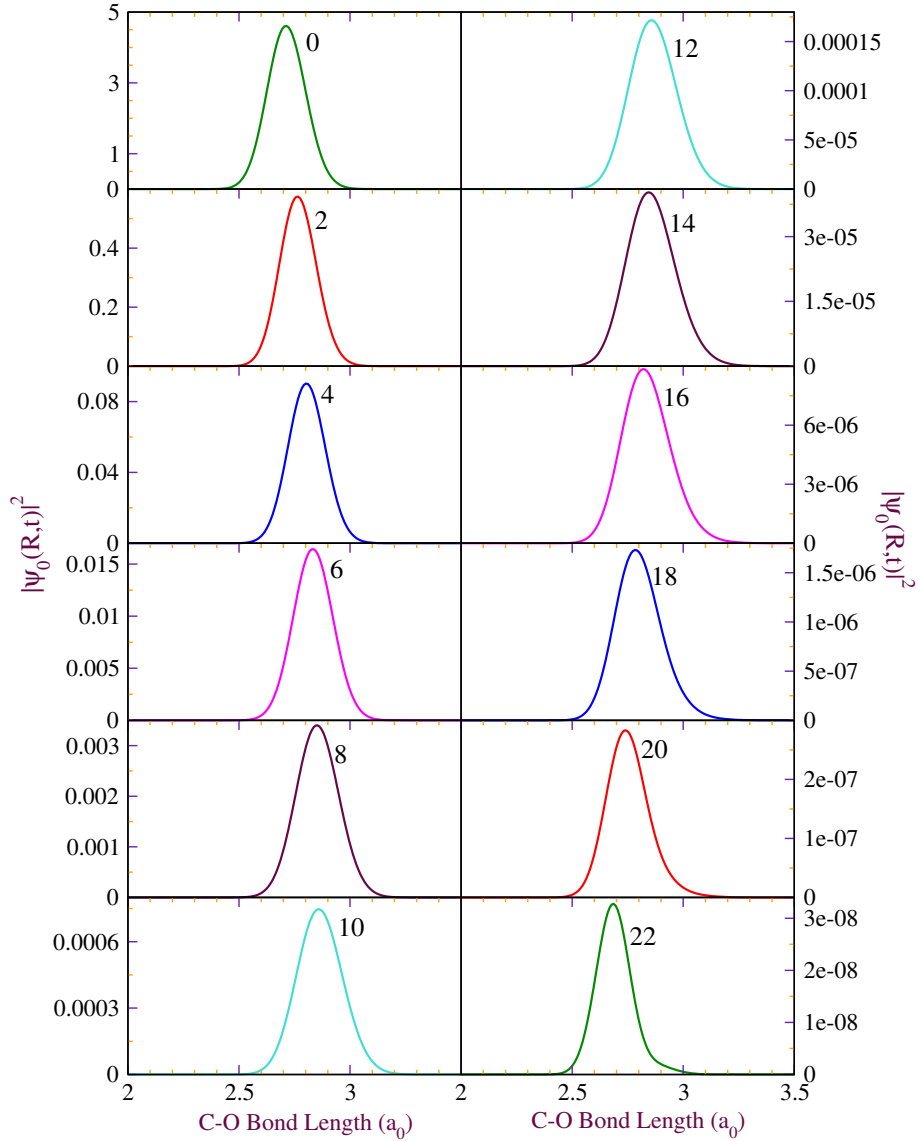

**FIG. S2** Plots of wave packet propagation from time  $t = 0$ –22 fs for the ground state wave function  $\phi_0(\mathbf{R})$  of the target 5'-dCMPH molecule under the effect of anionic Hamiltonian.

III. Plot of transmission coefficient (T) of the 5' C–O bond from the anionic vibrational states of HF and MP2 potentials.

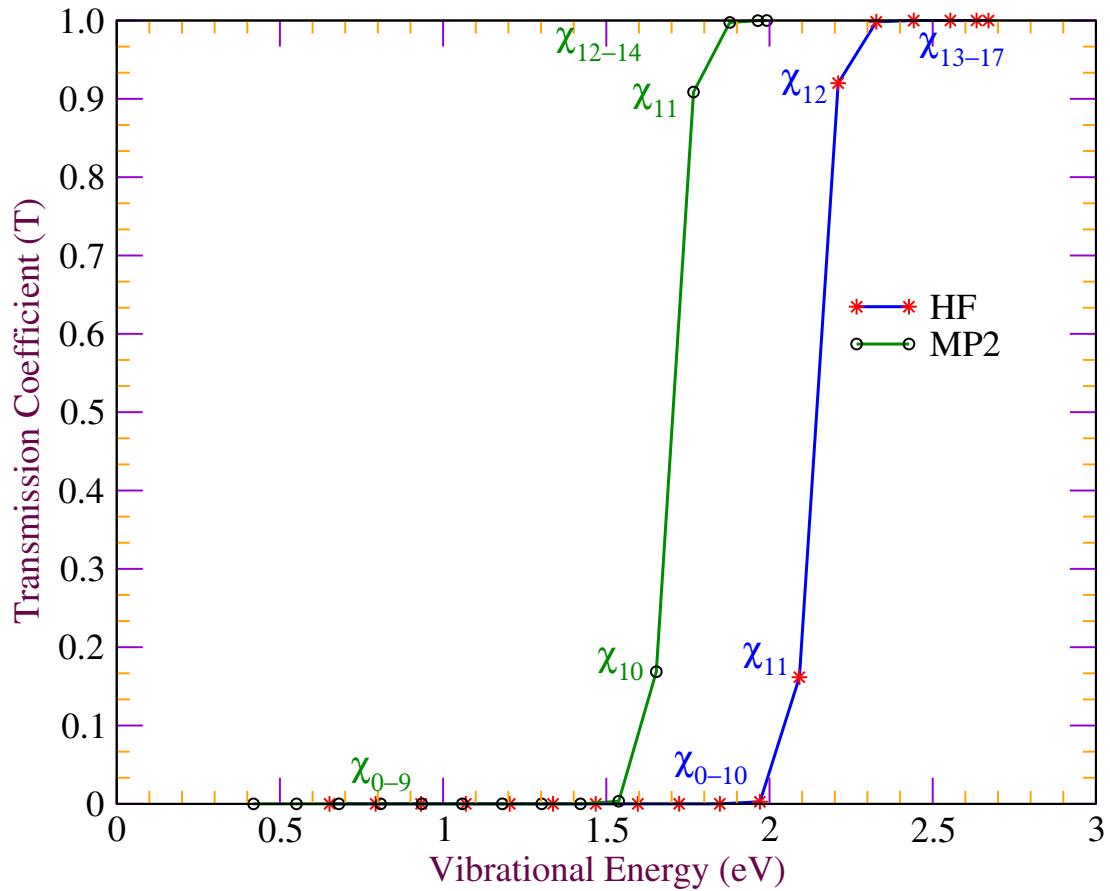

**FIG. S3.** “S-shaped” Transmission coefficient (T) curve of the 5' C–O bond from (a) HF anionic vibrational states  $\chi_{i=0-17}$  [blue line], and (b) MP2 anionic vibrational states  $\chi_{i=0-14}$  [green line].

IV. Plots of wave packet propagation from time  $t = 0$ –55 fs for the  $\phi_{12}(\mathbf{R})$  excited vibrational state function of the 5'-dCMPH molecule.

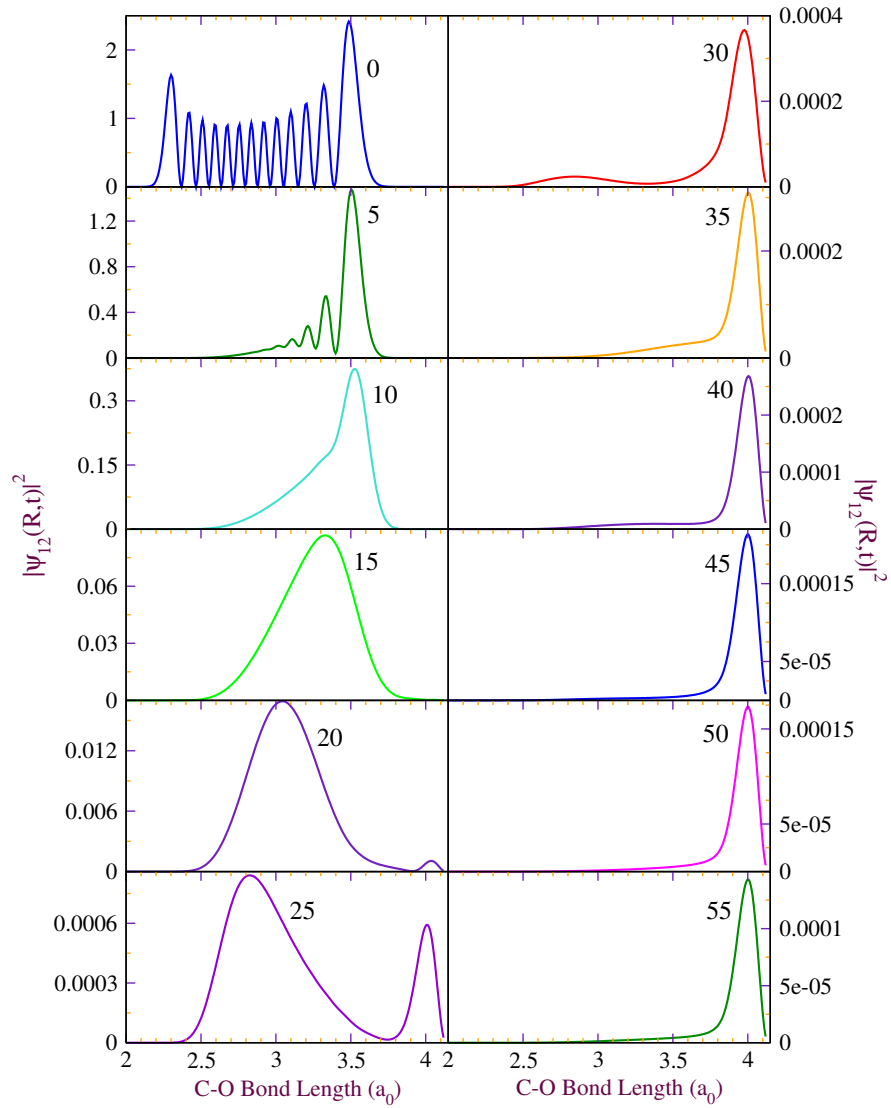

**FIG. S4.** Plots of wave packet propagation from time  $t = 0$ –55 fs for the excited state wave function  $\phi_{12}(\mathbf{R})$  of the target 5'-dCMPH molecule under the effect of anionic Hamiltonian.

V. Singly occupied molecular orbital (SOMO)s generated at the HF/6-31+G(d) accuracy level at various instances of 5' C–O bond breaking event.

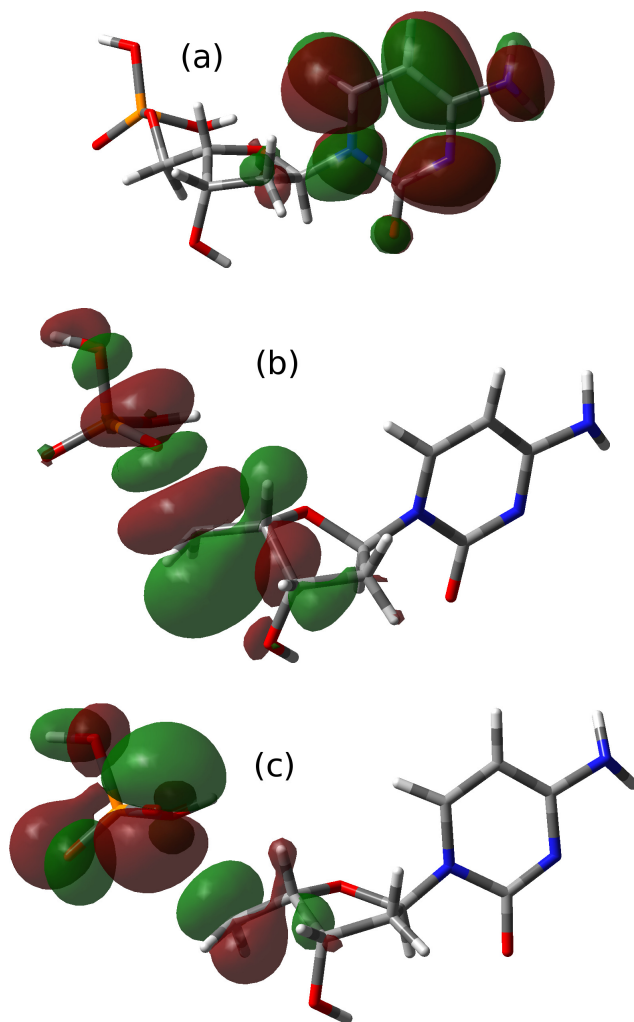

**FIG. S5.** Singly occupied molecular orbital (SOMO)s generated at the HF/6-31+G(d) accuracy level for anionic 5'-dCMPH moiety for the 5' C–O bond lengths of (a) 2.75 a<sub>0</sub> (1.45 Å), (b) 3.69 a<sub>0</sub> (1.95 Å), and (c) 5.67 a<sub>0</sub> (3.00 Å).
